# Supplementary material for: Learning to predict pain: differences in people with persistent neck pain and pain-free controls
Source: PeerJ. 2020 Jun 23;8:e9345. doi: 10.7717/peerj.9345 (PMC7319024; doi:10.7717/peerj.9345)
Supplement: Supplemental Information 2 [file peerj-08-9345-s002.xlsx]

## Sheet: Predictive learning data_Harvie
Group1patient0control	Age	Gender1female0male	CSplusPracticeBlock	CSminusPracticeBlock	GS3PracticeBlock	CSplusAcqBlock1	CSminusAcqBlock1	CSplusAcqBlock2	CSminusAcqBlock2	CSplusAcqBlock3	CSminusAcqBlock3	CSplusAcqBlock4	CSminusAcqBlock4	CSplusGenBlock1	CSminusGenBlock1	GS1GenBlock1	GS2GenBlock1	GS3GenBlock1	GS4GenBlock1	GS5GenBlock1	CSplusGenBlock2	CSminusGenBlock2	GS1GenBlock2	GS2GenBlock2	GS3GenBlock2	GS4GenBlock2	GS5GenBlock2	CSplusExtBlock1	CSminusExtBlock1	CSplusExtBlock2	CSminusExtBlock2	CSplusExtBlock3	CSminusExtBlock3	CSplusExtBlock4	CSminusExtBlock4	CSplusExtBlock5	CSminusExtBlock5	GS1GenOfExtBlock1	GS2GenOfExtBlock1	GS3GenOfExtBlock1	GS4GenOfExtBlock1	GS5GenOfExtBlock1	GS1GenOfExtBlock2	GS2GenOfExtBlock2	GS3GenOfExtBlock2	GS4GenOfExtBlock2	GS5GenOfExtBlock2	GS1GenOfExtBlock3	GS2GenOfExtBlock3
0	29	1	8	5	2	6.75	6.25	8.5	3.5	7.25	2.5	5.25	3.5	10	0	7	7	1	4	1	9	1	7	4	0	1	1	6.75	2.5	3.5	0.75	0.25	0.5	0	0	0	0	4	5	1	3	4	6	1	0	2	8	3	4
0	31	1	1	1	0	7.5	0	9.25	0	10	0	6.5	4.75	0	9	2	1	0	1	3	0	4	1	1	0	1	1	4.75	2.75	0	0	0	0	0	0	0	0	0	1	0	1	0	1	1	1	1	1	1	1
0	52	1	3	3	0	4.25	1	3.5	0.75	3.5	0	5	0	1	0	4	2	3	0	0	3	0	4	3	1	0	0	1.25	0	0.25	0	1	0	0	0	0	0	0	0	1	0	1	2	1	1	1	2	2	1
0	46	1	8	7	0	7.25	6.25	5	0	2.25	0	9	0	0	0	6	0	0	0	0	9	0	6	0	0	0	0	2.25	0	0	0	0	0	0	0	0	0	0	0	0	0	0	0	0	0	0	0	0	0
0	43	0	6	6	0	9.75	0.25	7.5	0	5	0	10	2.5	0	10	0	5	0	0	5	10	0	0	0	0	0	0	2.5	5	0	0	0	0	1.25	0	0	2.5	5	5	0	5	0	2	5	0	6	7	0	0
0	40	1	1	1	0	1.5	0.5	2.25	0	4.5	0	8	0	4	0	4	4	0	0	1	4	0	4	0	0	0	0	3.75	0	0.75	0	0.25	0	0	0	0	0	1	1	0	0	0	1	0	0	0	0	1	0
0	40	1	6	6	2	7.5	0.5	9.5	0.25	10	0	9.75	0	10	0	8	6	5	4	5	10	0	6	5	5	5	5	7.75	0	4	0	0.75	0	0	0	0	0	5	5	5	5	5	5	5	5	5	5	5	5
0	58	1	0	8	0	8.75	0	10	0	10	0	10	0	10	0	10	8	0	0	0	10	0	10	10	0	0	0	10	0	10	0	10	0	10	0	5	5	0	0	0	0	0	0	0	0	0	0	0	0
0	49	0	3	6	1	7	0	0	5	4.5	5	5	5	5	5	4	4	0	3	5	0	7	3	1	0	2	5	3.75	3.5	1	1	0	0.25	0	0	0	0	0	0	0	0	0	0	0	0	0	0	0	0
0	55	0	3	5	1	8.25	1.5	7.25	2	7.75	1	4.75	6.25	5	9	5	5	1	5	1	1	5	8	8	1	5	5	3	2.75	2	1	1	1	1	1	1	1	1	1	1	1	1	1	1	1	1	1	1	1
0	31	0	6	6	1	8.75	0.25	7.25	0	9.75	0	10	0	10	0	7	7	5	0	0	10	0	7	5	0	0	0	9.25	0	7.75	0	5	0	2.75	0	1.25	0	1	0	0	0	0	0	0	0	0	0	0	0
0	68	1	0	0	0	6.75	0	7.25	0	10	0	7.5	0	10	0	9	7	0	0	0	10	0	9	7	0	0	0	10	0	9.5	0	6.25	0	8.25	0	5.25	0	6	6	0	0	0	6	6	0	0	0	7	6
0	24	0	8	8	1	10	0.25	9.5	0	9.75	0	9.75	0	10	0	6	1	0	0	0	10	0	7	3	0	0	0	6.5	0	0	0	0	0	0	0	0	0	0	0	0	0	0	0	0	0	0	0	0	0
0	62	1	0	0	0	4.75	0	8.75	0	7.5	0	9.25	0	10	0	0	0	0	0	0	10	0	10	0	0	0	0	5	0	2.5	0	0	0	0	0	0	0	0	0	0	0	0	0	0	0	0	0	0	0
0	45	1	7	6	4	7.25	5.25	6.5	4	6.5	3.25	6	3.5	6	5	4	4	5	6	6	7	4	6	5	6	5	5	6.5	4	4.75	3	4.5	2.75	4	2	4.25	1.25	4	0	0	0	4	2	2	0	0	3	0	0
0	51	0	1	2	1	5.75	0.5	8.25	0	9.5	0	9.25	0	10	0	5	6	0	1	0	9	0	7	6	0	0	0	8.5	0	4.25	0	0.25	0	0	0	0	0	0	0	0	0	0	0	0	0	0	0	0	0
0	67	0	1	1	0	5.25	1	6	1	6	0.75	7.5	0	9	0	7	8	0	0	0	8	0	8	6	0	0	0	8	0	6.75	0	4.25	0	2	0	0.25	0	0	0	0	0	0	0	0	0	0	0	0	0
0	64	1	0	6	7	6.25	3	6	3	6.5	2.5	7	2.25	7	2	7	6	2	3	2	7	2	7	5	5	2	2	6	4	6.25	7	7	7.25	6.75	3.5	1	1	1	0	0	1	1	0	0	0	0	0	0	0
0	68	0	5	5	2	9.75	0	9.75	0	9.5	0	9.5	2.25	9	0	7	6	5	5	0	10	0	8	7	0	4	1	8.25	0	6	0	3.75	0	5	0	3	0	5	5	4	5	0	5	5	5	3	0	5	6
0	65	0	9	9	1	7.25	2.75	7.5	0	9.5	0	7	0	9	2	7	7	0	0	2	10	2	7	7	0	2	0	5.5	0	0.5	0	0	0	0	0	0	0	7	6	0	1	1	7	7	0	2	2	7	7
0	66	0	3	3	0	1.75	2.5	3	1	6.75	0.25	5.75	0	7	1	5	6	2	1	2	8	0	7	6	5	3	2	6	0.5	2.5	0	0.75	0	0	0	0	0	3	0	2	1	0	2	1	0	0	1	3	1
0	73	0	6	7	5	6.75	5.25	4.25	4.5	4.75	4	4.5	3	6	7	3	2	0	1	5	7	6	7	5	0	0	7	3	4.75	2.75	1.5	1.25	0	0	0.25	1.5	1.75	0	0	0	0	0	0	0	0	0	5	0	0
0	58	0	9	9	2	8.75	0.75	8	0	8.25	1.75	8.25	0	8	0	5	0	0	0	0	8	0	8	3	0	0	0	8	0	5	0	0.5	0	0	0	0	0	0	0	0	0	0	0	0	0	0	0	2	0
0	55	0	8	8	1	10	0.25	5.75	0	8	1	8	1.75	9	2	6	6	5	4	3	9	1	7	6	5	3	2	8	1.5	5.75	0	1.25	0	0	0	0	0	0	0	0	0	0	0	0	0	0	0	0	0
0	52	1	3	3	0	2	1	4.5	0	4.25	0	7.25	0	10	0	10	8	0	6	0	0	0	0	0	0	10	0	0	5.5	0	0.75	0	0	0	0	0	0	0	0	0	0	0	0	0	0	0	0	0	0
0	47	1	8	8	2	5.75	4	6.5	2.75	8	1	8.5	1.25	7	7	5	5	0	3	2	8	1	8	2	0	5	1	6	1	3.25	1.75	2	0.75	0	0.75	1	1	1	5	0	1	1	3	2	0	3	0	3	2
0	29	1	7	5	2	8.75	0.5	8.75	0	6.25	0	7.5	0	10	0	5	4	2	3	2	10	0	6	4	0	0	0	9.25	0	4.75	0	3.5	0	2.75	0	2.25	0	0	0	0	0	0	0	0	0	0	0	0	0
0	66	0	7	7	0	2.75	3.5	7	0	7	0	5	0	5	0	0	0	0	0	0	7	2	0	0	0	0	0	1.5	0	3.25	0	2.5	0	0	0	0	0	0	0	0	0	0	0	0	0	0	0	0	0
0	23	1	2	7	0	8.25	0.75	10	0	10	0	9.75	0	10	0	7	8	2	0	5	10	0	7	7	0	0	0	7	0	0	0	0	0	0	0	0	0	6	6	1	0	0	0	6	0	0	0	6	6
0	40	1	7	7	0	8.5	0.25	10	0	9.5	0.75	8.5	0.25	8	0	6	6	0	1	0	10	0	7	6	0	0	0	6.75	0.75	5	0	2	0	1	0	0	0	3	2	0	0	0	0	0	0	0	0	0	0
1	66	1	3	3	1	3.75	3.75	3.75	2.5	2.5	1	2	1	2	1	1	1	0	1	1	2	1	1	1	0	1	1	1.75	1.75	1	1	1.5	1	1	1	1.25	1	0	0	0	0	1	1	0	0	0	0	0	0
1	61	0	4	4	2	3	0	1.5	0	1	0	2	0	0	0	2	0	0	0	0	2	2	2	0	0	0	0	0.5	0	0.5	0	2.25	0	3.25	0	1.25	0	0	2	0	1	2	0	1	0	0	0	2	1
1	55	1	2	2	1	2.25	0	2.5	1.25	1.25	0.25	2	0	1	2	0	0	0	0	0	2	0	0	0	0	0	0	0.75	0.5	0	0	0	0	0	0	0	0	0	0	0	0	0	0	0	0	0	0	0	0
1	49	1	9	9	1	9	9	8.75	9	8.25	9	9	9	8	9	3	1	1	4	7	9	9	3	2	0	2	4	9	9	9	9	9	9	9	9	9	9	3	2	0	2	5	5	2	0	2	5	4	3
1	45	1	5	5	0	3.5	4.5	1	0.75	1.75	0	1	0	3	0	0	1	1	0	0	2	0	1	1	0	0	0	1	0	0	0	0	0	0	0	0	0	0	0	0	0	0	0	0	0	0	0	0	0
1	50	0	3	4	1	4	1.25	7.5	1	6.75	1.25	7	1	8	1	4	4	1	3	2	8	0	5	2	5	0	1	2	0.75	1.75	0.5	0.5	1.25	5.25	1	4	2	5	4	4	1	1	5	4	1	5	2	5	0
1	72	0	0	7	0	2.75	0	3	1.5	4.75	0	4.75	0	4	0	4	2	0	0	0	4	0	3	3	0	0	0	3.25	0	2	0	1.25	0	0	0	0	0	0	0	0	0	0	0	0	0	0	0	2	0
1	71	1	7	7	2	7.25	7.25	7	7	7.25	7.25	7.5	8	4	7	6	5	4	6	4	8	7	5	5	4	5	6	5.25	7	7.25	7.5	6.75	6.75	6.75	6.75	7	7	5	4	3	5	4	3	3	3	3	3	3	3
1	55	0	7	7	3	7	7	7	7.25	8	8	8	8	8	8	7	6	6	6	7	8	8	6	6	6	6	6	8	8	8	8	8	8	8	8	8	8	6	5	5	5	6	6	5	5	6	8	7	6
1	70	0	4	4	1	2.5	4.5	8.75	1	9.5	0.5	5	5	9	9	2	2	1	2	8	9	9	7	2	1	2	7	7	3	0.75	1	0	0	0	0	0	0	1	1	0	0	0	0	0	0	0	0	1	0
1	42	1	6	8	2	6.5	4.25	7.25	1	5	1.5	4.75	4.5	0	2	2	8	5	2	2	7	1	7	7	7	0	4	2.5	0	0	0	0	0	0	0	0	0.5	6	6	4	3	3	6	6	5	2	1	8	6
1	70	0	7	7	1	6	1.5	2.5	4	4	1	1	2.75	1	1	7	1	1	1	7	7	1	4	1	1	6	1	1	2.5	1	1	1	1	1	1	1	1	1	1	1	1	1	1	1	1	1	1	1	1
1	60	1	6	7	1	7.25	1.25	8	1	7.25	1	7.25	1	7	1	6	3	1	1	1	7	1	5	4	1	1	1	5.75	1	1	1	1	1	1.5	1	1	1	1	1	1	1	1	1	1	1	1	1	1	1
1	47	0	8	8	1	8	2.75	2.75	2.75	4.5	4.5	2.75	2.75	1	1	1	4	1	4	7	1	8	1	1	1	7	1	2.5	2.75	1	1	1	1	1	1	1	1	1	1	1	1	1	1	1	1	1	1	1	1
1	27	1	4	4	2	5.5	1	3.5	0	2.75	0	4.25	0	3	0	1	1	0	0	0	2	0	2	1	0	0	0	1.5	0	0	0	0	0	0	0	0	0	0	0	0	0	0	0	0	0	1	0	0	0
1	46	1	6	6	2	6	5.75	5	5	4.25	4.5	0.75	1	2	0	2	1	0	1	1	1	0	1	0	0	2	1	1.25	1	0.75	0.25	0	0.25	0.25	0.25	0	0	2	1	0	0	1	0	1	0	0	0	0	0
1	63	0	2	2	0	5.5	3.25	6.25	0	6.75	0	9.25	0	10	0	6	4	5	3	0	10	0	9	7	4	2	0	8	0	0	0	0	0	0	0	0	0	0	0	0	0	0	0	0	0	0	0	1	0
1	18	1	5	5	0	6.25	2	3.5	4	3.25	4	6.25	5	5	7	2	0	0	3	2	8	8	2	2	0	1	4	7.75	7.25	3.75	3.25	0.25	0	0	0	0	0	0	0	0	0	0	0	0	0	0	0	2	0
1	58	0	5	5	1	4.5	1.25	2.75	0	2.25	0	1.5	0.75	3	3	3	3	0	3	0	3	0	3	3	0	0	3	0.75	0.75	0	0	0	0	0	0	0	0	2	2	0	2	2	0	0	0	0	0	0	0
1	52	0	5	7	0	5.75	2.25	5.75	0.25	6	0	6.5	0.5	7	0	5	4	0	3	4	7	0	5	4	0	1	1	6.5	0.75	0	0	0	0	0	0	0	0	3	3	0	0	0	5	4	0	0	0	4	1
1	30	1	3	3	0	2.75	3	3	3	2.5	2.5	2	2	3	3	2	0	0	0	0	3	3	0	0	0	0	0	3	3	3	3	3	3	3	3	3	3	0	0	0	0	0	2	0	0	0	2	2	0
1	70	0	1	3	0	0.75	1.5	0	2.25	0	2.25	0	1.5	3	0	3	1	1	7	3	0	3	0	1	0	7	3	0	0.75	0	0	0	0	0	0	0	0	7	0	0	3	7	2	2	0	2	2	2	2
1	63	1	8	8	2	6	8	8	8	8	8	8	8	8	8	6	3	2	2	4	8	8	5	4	2	3	5	8	8	8	8	8	8	8	8	6	8	3	3	2	3	3	3	3	2	3	3	3	4
1	45	1	10	10	0	5	5	0	7.5	5	2.5	10	0	0	10	0	0	0	0	0	0	0	0	0	0	0	0	0	2.5	0	0	0	0	0	0	0	0	0	0	0	0	0	0	0	0	0	0	0	0
1	20	0	0	3	0	4	0	4	0	2	0	3	0	4	0	0	2	0	0	0	4	0	0	0	0	0	0	1	0	0	0	0	0	0	0	0	0	0	0	0	0	0	0	0	0	0	0	2	0
1	66	0	4	5	4	5.25	4.75	5.5	3.5	6.75	2.25	4.75	1.25	7	1	3	4	0	4	2	7	2	7	0	0	0	4	4.75	1	1	1	1	1	1	0.5	0.5	0.25	0	0	0	0	0	0	1	0	0	0	0	0
1	27	0	4	7	0	9.25	2.25	6.5	2.5	8.25	0	8.75	0	4	0	0	0	0	0	0	7	0	0	0	0	0	0	3.75	0	0	0	0	0	0	0	0	0	0	0	0	0	0	0	0	0	0	0	0	0
1	45	1	6	5	0	4.5	2.25	9	0	5	0	10	0	10	0	0	0	0	0	0	10	0	0	0	0	0	0	5	0	0	0	0	0	0	0	0	0	0	0	0	0	0	0	0	0	0	0	0	0
1	55	1	3	0	0	3	0.75	7.25	0	9.5	0.5	8.25	1	7	1	8	4	0	2	1	8	0	9	3	2	0	0	5.5	0	1.5	0	0	0	0	0	0	0	0	0	0	0	0	0	0	0	0	0	0	0
1	29	1	0	3	0	5.75	0	9.25	0	8.75	0	10	0	10	0	7	6	0	0	0	10	0	8	3	0	0	0	8.5	0	2.5	0	1.75	0	0	0	0	0	0	0	0	0	0	0	0	0	0	0	0	0
[truncated: 52 more columns]
